# Supplementary material for: Lower Serum Uric Acid Levels May Lower the Incidence of Diabetic Chronic Complications in U.S. Adults Aged 40 and Over
Source: MDPI journal article supplement (doi:10.3390/jcm12020725), 2023-01-16
Supplement: s1 [file s1]

## Supplementary Materials:

Table S1. Clinical features of the involved diabetes patients for the analysis of diabetic kidney disease ( $n = 3075$ ).

Table S2. Clinical features of the involved diabetes patients for the analysis of diabetic peripheral neuropathy ( $n = 1453$ ).

Table S3. Clinical features of the involved diabetes patients for the analysis of diabetic retinopathy ( $n = 1233$ ).

Table S4. Clinical features of diabetic patients aged 40 and over with or without diabetic kidney disease ( $n = 3075$ ).

Table S5. Clinical features of diabetic patients aged 40 and over with or without cardiovascular disease ( $n = 3106$ ).

Table S6. Clinical features of diabetic patients aged 40 and over with or without diabetic peripheral neuropathy ( $n = 1453$ ).

Table S7. Clinical features of diabetic patients aged 40 and over with or without diabetic retinopathy ( $n = 1233$ ).

**Table S1.** Clinical features of the involved diabetes patients for the analysis of diabetic kidney disease ( $n = 3075$ ).

| SUA Levels                                   | SUA≤300      | 300 <SUA≤ 420 | SUA>420      | P Value |
|----------------------------------------------|--------------|---------------|--------------|---------|
| Age (year) †                                 | 62 (19)      | 65 (16)       | 67 (16)      | <0.01   |
| Males (%) †                                  | 479 (42.9)   | 720 (53.3)    | 385 (63.2)   | <0.01   |
| Race (%) †                                   |              |               |              | <0.01   |
| Mexican American                             | 365 (32.7)   | 320 (23.7)    | 59 (9.7)     |         |
| Other Hispanic                               | 81 (7.3)     | 75 (5.6)      | 25 (4.1)     |         |
| Non-Hispanic White                           | 407 (36.5)   | 583 (43.2)    | 281 (46.1)   |         |
| Non-Hispanic Black                           | 221 (19.8)   | 334 (24.7)    | 219 (36.0)   |         |
| Other race                                   | 42 (3.8)     | 38 (2.8)      | 25 (4.1)     |         |
| Education level (%) †                        |              |               |              | <0.01   |
| Less than 9th grade                          | 325 (29.1)   | 356 (26.4)    | 107 (17.6)   |         |
| 9–11th grade                                 | 237 (21.2)   | 235 (17.4)    | 128 (21.0)   |         |
| High school graduate                         | 219 (19.6)   | 303 (22.4)    | 165 (27.1)   |         |
| College or AA degree                         | 234 (21.0)   | 283 (21.0)    | 131 (21.5)   |         |
| College graduate or above                    | 101 (9.1)    | 171 (12.7)    | 77 (12.6)    |         |
| Waist circumference (cm) †                   | 101.8 (17.4) | 107.7 (19.2)  | 110.3 (19.5) | <0.01   |
| Cholesterol (mmol/L) †                       | 5.04 (1.47)  | 4.94 (1.50)   | 4.86 (1.50)  | 0.083   |
| Triglyceride (mmol/L) †                      | 1.72 (1.36)  | 1.83 (1.57)   | 1.90 (1.50)  | <0.01   |
| Creatinine (μmol/L) †                        | 70.7 (26.52) | 79.6 (26.54)  | 99.0 (51.27) | <0.01   |
| Poverty income ratio < 1 (%) †               | 234 (22.9)   | 279 (22.6)    | 99 (18.0)    | 0.051   |
| Serum uric acid (μmol/L) †                   | 255.8 (53.6) | 350.9 (53.6)  | 469.9 (68.3) | <0.01   |
| Glycohemoglobin (%) †                        | 7.2 (2.4)    | 6.7 (1.5)     | 6.6 (1.3)    | <0.01   |
| Taking insulin now (%) †                     | 203 (18.4)   | 220 (16.5)    | 130 (21.6)   | 0.059   |
| Fasting glucose (mmol/L) †                   | 7.88 (4.94)  | 7.22 (3.23)   | 7.16 (2.77)  | <0.01   |
| Duration of diabetes (year) †                | 9 (13)       | 8 (13)        | 10 (15)      | 0.034   |
| Hypertension (%) †                           | 588 (52.7)   | 904 (67.0)    | 476 (78.2)   | <0.01   |
| Smoked at least 100 cigarettes in life (%) † | 559 (50.1)   | 724 (53.6)    | 361 (59.3)   | <0.01   |

SUA: Serum uric acid. Data are number of subjects (percentage) or medians (interquartile ranges).

† Kruskal–Wallis test was used to compare the median values among participants in different groups. ‡ Chi-square test was used to compare the percentage among participants in different groups.

**Table S2.** Clinical features of the involved diabetes patients for the analysis of diabetic peripheral neuropathy ( $n = 1453$ ).

| SUA Levels                                   | SUA≤300      | 300 <SUA≤ 420 | SUA>420      | <i>p</i> Value |
|----------------------------------------------|--------------|---------------|--------------|----------------|
| Age (year) †                                 | 62 (18)      | 65 (17)       | 67 (15)      | <0.01          |
| Males (%) †                                  | 260 (46.4)   | 371 (57.7)    | 157 (62.8)   | <0.01          |
| Race (%) †                                   |              |               |              | <0.01          |
| Mexican American                             | 219 (39.1)   | 174 (27.1)    | 28 (11.2)    |                |
| Other Hispanic                               | 26 (4.6)     | 26 (4.0)      | 10 (4.0)     |                |
| Non-Hispanic White                           | 194 (34.6)   | 273 (42.5)    | 119 (47.6)   |                |
| Non-Hispanic Black                           | 97 (17.3)    | 152 (23.6)    | 80 (32.0)    |                |
| Other race                                   | 24 (4.3)     | 18 (2.8)      | 13 (5.2)     |                |
| Education level (%) †                        |              |               |              | <0.01          |
| Less than 9th grade                          | 179 (32.0)   | 175 (27.2)    | 48 (19.2)    |                |
| 9–11th grade                                 | 118 (21.1)   | 110 (17.1)    | 54 (21.6)    |                |
| High school graduate                         | 96 (17.1)    | 140 (21.8)    | 71 (28.4)    |                |
| College or AA degree                         | 111 (19.8)   | 137 (21.3)    | 51 (20.4)    |                |
| College graduate or above                    | 56 (10.0)    | 81 (12.6)     | 26 (10.4)    |                |
| Waist circumference (cm) †                   | 101.0 (16.2) | 106.7 (18.6)  | 109.0 (20.5) | <0.01          |
| Cholesterol (mmol/L) †                       | 5.09 (1.40)  | 5.07 (1.50)   | 5.09 (1.36)  | 0.774          |
| Triglyceride (mmol/L) †                      | 1.67 (1.29)  | 1.78 (1.54)   | 1.96 (1.46)  | <0.01          |
| Creatinine (μmol/L) †                        | 70.7 (26.52) | 79.6 (26.54)  | 97.2 (53.04) | <0.01          |
| Poverty income ratio < 1 (%) †               | 118 (22.9)   | 135 (23.1)    | 37 (16.4)    | 0.090          |
| Serum uric acid (μmol/L) †                   | 255.8 (59.5) | 350.9 (53.6)  | 469.9 (59.4) | <0.01          |
| Glycohemoglobin (%) †                        | 7.6 (2.5)    | 6.7 (1.5)     | 6.7 (1.4)    | <0.01          |
| Taking insulin now (%) †                     | 107 (19.5)   | 110 (17.4)    | 47 (19.3)    | 0.632          |
| Fasting glucose (mmol/L) †                   | 7.77 (5.11)  | 7.11 (3.22)   | 6.94 (2.75)  | <0.01          |
| Duration of diabetes (year) †                | 9 (16)       | 7 (14)        | 9 (17)       | 0.054          |
| Hypertension (%) †                           | 291 (52.0)   | 444 (69.2)    | 190 (76.0)   | <0.01          |
| Smoked at least 100 cigarettes in life (%) † | 289 (51.6)   | 362 (56.3)    | 153 (61.2)   | <0.01          |

SUA: Serum uric acid. Data are number of subjects (percentage) or medians (interquartile ranges). † Kruskal–Wallis test was used to compare the median values among participants in different groups. ‡ Chi-square test was used to compare the percentage among participants in different groups.

**Table S3.** Clinical features of the involved diabetes patients for the analysis of diabetic retinopathy ( $n = 1233$ ).

| SUA Levels                 | SUA≤300      | 300 <SUA≤ 420 | SUA>420      | <i>p</i> Value |
|----------------------------|--------------|---------------|--------------|----------------|
| Age (year) †               | 61 (18)      | 64 (17)       | 65 (17)      | <0.01          |
| Males (%) †                | 168 (39.7)   | 275 (50.5)    | 174 (65.7)   | <0.01          |
| Race (%) †                 |              |               |              | <0.01          |
| Mexican American           | 102 (24.1)   | 114 (20.9)    | 21 (7.9)     |                |
| Other Hispanic             | 42 (9.9)     | 38 (7.0)      | 14 (5.3)     |                |
| Non-Hispanic White         | 170 (40.2)   | 242 (44.4)    | 119 (44.9)   |                |
| Non-Hispanic Black         | 95 (22.5)    | 138 (25.3)    | 107 (40.4)   |                |
| Other race                 | 14 (3.3)     | 13 (2.4)      | 4 (1.5)      |                |
| Education level (%) †      |              |               |              | 0.017          |
| Less than 9th grade        | 86 (20.3)    | 126 (23.1)    | 38 (14.3)    |                |
| 9–11th grade               | 90 (21.3)    | 94 (17.2)     | 51 (19.2)    |                |
| High school graduate       | 108 (25.5)   | 131 (24.0)    | 72 (27.2)    |                |
| College or AA degree       | 102 (24.1)   | 114 (20.9)    | 67 (25.3)    |                |
| College graduate or above  | 37 (8.7)     | 80 (14.7)     | 37 (14.0)    |                |
| Waist circumference (cm) † | 102.4 (18.7) | 108.7 (19.8)  | 112.2 (19.9) | <0.01          |
| Cholesterol (mmol/L) †     | 4.91 (1.60)  | 4.78 (1.44)   | 4.66 (1.59)  | 0.152          |
| Triglyceride (mmol/L) †    | 1.73 (1.38)  | 1.87 (1.53)   | 1.89 (1.54)  | 0.045          |

|                                              |              |              |              |       |
|----------------------------------------------|--------------|--------------|--------------|-------|
| Creatinine (μmol/L) †                        | 70.7 (25.33) | 81.3 (26.52) | 99.0 (42.88) | <0.01 |
| Poverty income ratio < 1 (%) ‡               | 80 (20.6)    | 98 (19.4)    | 44 (18.1)    | 0.736 |
| Serum uric acid (μmol/L) †                   | 255.8 (53.6) | 350.9 (53.6) | 463.9 (71.3) | <0.01 |
| Glycohemoglobin (%) †                        | 6.9 (2.3)    | 6.6 (1.6)    | 6.5 (1.2)    | <0.01 |
| Taking insulin now (%) ‡                     | 69 (16.3)    | 76 (13.9)    | 59 (22.3)    | 0.011 |
| Fasting glucose (mmol/L) †                   | 7.94 (4.61)  | 7.27 (3.16)  | 7.38 (2.60)  | <0.01 |
| Duration of diabetes (year) †                | 8 (11)       | 7 (10)       | 10 (12)      | 0.174 |
| Hypertension (%) ‡                           | 229 (54.1)   | 360 (66.1)   | 212 (80.0)   | <0.01 |
| Smoked at least 100 cigarettes in life (%) ‡ | 216 (51.1)   | 296 (54.3)   | 158 (59.6)   | 0.193 |

SUA: Serum uric acid. Data are number of subjects (percentage) or medians (interquartile ranges). † Kruskal–Wallis test was used to compare the median values among participants in different groups. ‡ Chi-square test was used to compare the percentage among participants in different groups.

**Table S4.** Clinical features of diabetic patients aged 40 and over with or without diabetic kidney disease (*n* = 3075).

| Sua Levels                                   | Diabetic Kidney Disease | Non-Diabetic Kidney Disease | <i>p</i> Value |
|----------------------------------------------|-------------------------|-----------------------------|----------------|
| Age (year) †                                 | 69 (16)                 | 62 (17)                     | <0.01          |
| Males (%) ‡                                  | 737 (52.7)              | 847 (50.5)                  | 0.23           |
| Race (%) ‡                                   |                         |                             | 0.53           |
| Mexican American                             | 328 (23.5)              | 416 (24.8)                  |                |
| Other Hispanic                               | 77 (5.5)                | 104 (6.2)                   |                |
| Non-Hispanic White                           | 599 (42.8)              | 672 (40.1)                  |                |
| Non-Hispanic Black                           | 350 (25.0)              | 424 (25.3)                  |                |
| Other race                                   | 44 (3.1)                | 61 (3.6)                    |                |
| Education level (%) †                        |                         |                             | <0.01          |
| Less than 9th grade                          | 400 (28.6)              | 388 (23.1)                  |                |
| 9–11th grade                                 | 299 (21.4)              | 301 (17.9)                  |                |
| High school graduate                         | 296 (21.2)              | 391 (23.3)                  |                |
| College or AA degree                         | 273 (19.5)              | 375 (22.4)                  |                |
| College graduate or above                    | 129 (9.2)               | 220 (13.1)                  |                |
| Waist circumference (cm) †                   | 105.7 (19.4)            | 106.2 (19.2)                | 0.740          |
| Cholesterol (mmol/L) †                       | 4.94 (1.63)             | 4.99 (1.40)                 | 0.618          |
| Triglyceride (mmol/L) †                      | 1.86 (1.55)             | 1.75 (1.42)                 | 0.022          |
| Creatinine (μmol/L) †                        | 96.4 (53.0)             | 70.7 (26.5)                 | <0.01          |
| Poverty income ratio < 1 (%) ‡               | 289 (22.9)              | 323 (20.9)                  | 0.215          |
| Serum uric acid (μmol/L) †                   | 350.9 (136.8)           | 315.2 (113.0)               | <0.01          |
| Glycohemoglobin (%) †                        | 6.9 (1.9)               | 6.7 (1.6)                   | <0.01          |
| Taking insulin now (%) ‡                     | 344 (24.8)              | 209 (12.6)                  | <0.01          |
| Fasting glucose (mmol/L) †                   | 7.55 (4.16)             | 7.27 (3.31)                 | <0.01          |
| Duration of diabetes (year) †                | 11 (15)                 | 6 (10)                      | <0.01          |
| Hypertension (%) ‡                           | 996 (71.3)              | 972 (58.0)                  | <0.01          |
| Smoked at least 100 cigarettes in life (%) ‡ | 767 (54.9)              | 877 (52.3)                  | 0.354          |

Data are number of subjects (percentage) or medians (interquartile ranges). † Kruskal–Wallis test was used to compare the median values among participants in different groups. ‡ Chi-square test was used to compare the percentage among participants in different groups.

**Table S5.** Clinical features of diabetic patients aged 40 and over with or without cardiovascular disease ( $n = 3106$ ).

| SUA Levels                                   | Cardiovascular Disease | Non-Cardiovascular Disease | <i>p</i> Value |
|----------------------------------------------|------------------------|----------------------------|----------------|
| Age (year) †                                 | 69 (15)                | 63 (18)                    | <0.01          |
| Males (%) †                                  | 506 (56.9)             | 1099 (49.6)                | <0.01          |
| Race (%) †                                   |                        |                            | <0.01          |
| Mexican American                             | 155 (17.4)             | 593 (23.8)                 |                |
| Other Hispanic                               | 33 (3.7)               | 150 (6.8)                  |                |
| Non-Hispanic White                           | 442 (49.7)             | 840 (37.9)                 |                |
| Non-Hispanic Black                           | 230 (25.9)             | 556 (25.1)                 |                |
| Other race                                   | 29 (3.3)               | 78 (3.5)                   |                |
| Education level (%) †                        |                        |                            | 0.11           |
| Less than 9th grade                          | 218 (24.5)             | 580 (26.2)                 |                |
| 9–11th grade                                 | 196 (22.0)             | 412 (18.6)                 |                |
| High school graduate                         | 201 (22.6)             | 490 (22.1)                 |                |
| College or AA degree                         | 186 (20.9)             | 467 (21.1)                 |                |
| College graduate or above                    | 87 (9.8)               | 267 (12.0)                 |                |
| Waist circumference (cm) †                   | 107.2 (18.0)           | 105.2 (19.6)               | <0.01          |
| Cholesterol (mmol/L) †                       | 4.68 (1.53)            | 5.07 (1.47)                | <0.01          |
| Triglyceride (mmol/L) †                      | 1.84 (1.52)            | 1.78 (1.45)                | 0.81           |
| Creatinine (μmol/L) †                        | 88.4 (44.2)            | 76.0 (28.3)                | <0.01          |
| Poverty income ratio < 1 (%) ‡               | 175 (21.7)             | 436 (21.5)                 | 0.96           |
| Serum uric acid (μmol/L) †                   | 350.9 (139.8)          | 321.2 (118.9)              | <0.01          |
| Glycohemoglobin (%) †                        | 6.8 (1.6)              | 6.8 (1.9)                  | 0.079          |
| Taking insulin now (%) †                     | 236 (26.8)             | 323 (14.7)                 | <0.01          |
| Fasting glucose (mmol/L) †                   | 7.27 (3.66)            | 7.44 (3.66)                | 0.105          |
| Duration of diabetes (year) †                | 11 (16)                | 8 (12)                     | <0.01          |
| Hypertension (%) †                           | 696 (78.3)             | 1298 (58.6)                | <0.01          |
| Smoked at least 100 cigarettes in life (%) ‡ | 525 (59.1)             | 1142 (51.5)                | <0.01          |

Data are number of subjects (percentage) or medians (interquartile ranges). † Kruskal–Wallis test was used to compare the median values among participants in different groups. ‡ Chi-square test was used to compare the percentage among participants in different groups.

**Table S6.** Clinical features of diabetic patients aged 40 and over with or without diabetic peripheral neuropathy ( $n = 1453$ ).

| SUA Levels                 | Peripheral Neuropathy | Non-Peripheral Neuropathy | <i>p</i> Value |
|----------------------------|-----------------------|---------------------------|----------------|
| Age (year) †               | 68 (16)               | 64 (17)                   | <0.01          |
| Males (%) †                | 260 (64.5)            | 528 (50.3)                | <0.01          |
| Race (%) †                 |                       |                           | 0.12           |
| Mexican American           | 110 (27.3)            | 311 (29.6)                |                |
| Other Hispanic             | 10 (2.5)              | 52 (5.0)                  |                |
| Non-Hispanic White         | 179 (44.4)            | 407 (38.8)                |                |
| Non-Hispanic Black         | 88 (21.8)             | 241 (23.0)                |                |
| Other race                 | 16 (4.0)              | 39 (3.7)                  |                |
| Education level (%) †      |                       |                           | 0.18           |
| Less than 9th grade        | 124 (30.8)            | 278 (26.5)                |                |
| 9–11th grade               | 76 (18.9)             | 206 (19.6)                |                |
| High school graduate       | 91 (22.6)             | 216 (20.6)                |                |
| College or AA degree       | 68 (16.9)             | 231 (22.0)                |                |
| College graduate or above  | 44 (10.9)             | 119 (11.3)                |                |
| Waist circumference (cm) † | 106.7 (19.4)          | 104.5 (17.8)              | 0.013          |
| Cholesterol (mmol/L) †     | 4.91 (1.40)           | 5.12 (1.43)               | <0.01          |
| Triglyceride (mmol/L) †    | 1.77 (1.24)           | 1.78 (1.51)               | 0.241          |

|                                                         |               |               |       |
|---------------------------------------------------------|---------------|---------------|-------|
| Creatinine ( $\mu\text{mol/L}$ ) <sup>†</sup>           | 88.4 (35.4)   | 70.7 (26.5)   | <0.01 |
| Poverty income ratio < 1 (%) <sup>‡</sup>               | 77 (20.7)     | 213 (22.3)    | 0.52  |
| Serum uric acid ( $\mu\text{mol/L}$ ) <sup>†</sup>      | 339.0 (130.9) | 321.2 (118.9) | 0.021 |
| Glycohemoglobin (%) <sup>†</sup>                        | 7.1 (2.1)     | 6.9 (1.9)     | 0.229 |
| Taking insulin now (%) <sup>‡</sup>                     | 110 (27.7)    | 154 (15.0)    | <0.01 |
| Fasting glucose (mmol/L) <sup>†</sup>                   | 7.60 (4.72)   | 7.22 (3.61)   | 0.016 |
| Duration of diabetes (year) <sup>†</sup>                | 12 (18)       | 7 (12)        | <0.01 |
| Hypertension (%) <sup>‡</sup>                           | 277 (68.7)    | 648 (61.8)    | 0.014 |
| Smoked at least 100 cigarettes in life (%) <sup>‡</sup> | 220 (54.6)    | 584 (55.6)    | 0.72  |

Data are number of subjects (percentage) or medians (interquartile ranges). <sup>†</sup> Kruskal–Wallis test was used to compare the median values among participants in different groups. <sup>‡</sup> Chi-square test was used to compare the percentage among participants in different groups.

**Table S7.** Clinical features of diabetic patients aged 40 and over with or without diabetic retinopathy ( $n = 1233$ ).

| SUA Levels                                              | Diabetic Retinopathy | Non-Diabetic Retinopathy | <i>p</i> Value |
|---------------------------------------------------------|----------------------|--------------------------|----------------|
| Age (year) <sup>†</sup>                                 | 63 (15)              | 63 (18)                  | 0.465          |
| Males (%) <sup>‡</sup>                                  | 234 (54.8)           | 383 (47.5)               | 0.015          |
| Race (%) <sup>‡</sup>                                   |                      |                          | 0.016          |
| Mexican American                                        | 82 (19.2)            | 155 (19.2)               |                |
| Other Hispanic                                          | 31 (7.3)             | 63 (7.8)                 |                |
| Non-Hispanic White                                      | 161 (37.7)           | 370 (45.9)               |                |
| Non-Hispanic Black                                      | 142 (33.3)           | 198 (24.6)               |                |
| Other race                                              | 11 (2.6)             | 20 (2.5)                 |                |
| Education level (%) <sup>‡</sup>                        |                      |                          | 0.021          |
| Less than 9th grade                                     | 100 (23.4)           | 150 (18.6)               |                |
| 9–11th grade                                            | 90 (21.1)            | 145 (18.0)               |                |
| High school graduate                                    | 93 (21.8)            | 218 (27.0)               |                |
| College or AA degree                                    | 102 (23.9)           | 181 (22.5)               |                |
| College graduate or above                               | 42 (9.8)             | 112 (13.9)               |                |
| Waist circumference (cm) <sup>†</sup>                   | 107 (20.7)           | 107 (19.9)               | 0.508          |
| Cholesterol (mmol/L) <sup>†</sup>                       | 4.71 (1.68)          | 4.86 (1.47)              | 0.106          |
| Triglyceride (mmol/L) <sup>†</sup>                      | 1.71 (1.48)          | 1.85 (1.44)              | 0.022          |
| Creatinine ( $\mu\text{mol/L}$ ) <sup>†</sup>           | 81.3 (43.3)          | 79.6 (30.1)              | 0.026          |
| Poverty income ratio < 1 (%) <sup>‡</sup>               | 83 (21.5)            | 139 (18.5)               | 0.23           |
| Serum uric acid ( $\mu\text{mol/L}$ ) <sup>†</sup>      | 333.1 (124.9)        | 339 (124.9)              | 0.653          |
| Glycohemoglobin (%) <sup>†</sup>                        | 7.3 (2.3)            | 6.5 (1.2)                | <0.01          |
| Taking insulin now (%) <sup>‡</sup>                     | 143 (33.5)           | 61 (7.6)                 | <0.01          |
| Fasting glucose (mmol/L) <sup>†</sup>                   | 8.05 (5.22)          | 7.30 (2.61)              | <0.01          |
| Duration of diabetes (year) <sup>†</sup>                | 12 (12.3)            | 5 (8)                    | <0.01          |
| Hypertension (%) <sup>‡</sup>                           | 296 (69.3)           | 505 (62.7)               | 0.02           |
| Smoked at least 100 cigarettes in life (%) <sup>‡</sup> | 224 (52.5)           | 446 (55.3)               | 0.47           |

Data are number of subjects (percentage) or medians (interquartile ranges). <sup>†</sup> Kruskal–Wallis test was used to compare the median values among participants in different groups. <sup>‡</sup> Chi-square test was used to compare the percentage among participants in different groups.
